# Supplementary material for: Site-specific phosphorylation regulates the structure and function of an intrinsically disordered domain of the glucocorticoid receptor
Source: PubMed Central journal article supplement (PMC5684351; doi:10.1038/s41598-017-15549-5), 2017-11-13
Supplement: 41598_2017_15549_MOESM1_ESM.pdf [file 41598_2017_15549_MOESM1_ESM.pdf]

## **Supplementary Information**

**Site-specific phosphorylation regulates the structure and function of an intrinsically disordered domain of the glucocorticoid receptor**

Shagufta H Khan, William A McLaughlin, and Raj Kumar\*

Department of Basic Sciences, Geisinger Commonwealth School of Medicine, Scranton, PA, USA

**Table 1: A list of recombinant AF1 and AF1<sub>c</sub> proteins**

| <b>Plasmid vector</b>   | <b>Site of mutation</b> | <b>Type of mutation</b> |
|-------------------------|-------------------------|-------------------------|
| AF1                     | none                    | Wild-type               |
| AF1-S203A               | 203                     | Ser-Ala                 |
| AF1-S203E               | 203                     | Ser-Glu                 |
| AF1-S211A               | 211                     | Ser-Ala                 |
| AF1-S211E               | 211                     | Ser-Glu                 |
| AF1-S226A               | 226                     | Ser-Ala                 |
| AF1-S226E               | 226                     | Ser-Glu                 |
| AF1 <sub>c</sub>        | none                    | Wild-type               |
| AF1 <sub>c</sub> -S211A | 211                     | Ser-Ala                 |
| AF1 <sub>c</sub> -S211E | 211                     | Ser-Glu                 |

**AF1<sub>c</sub> amino acids (187-244) sequences:**

dqst fdilqdefls sgspgketne spwrsdllid encllspilag eddsfllegn sned

**AF1 amino acid (77-262) sequences:**

gspgidlska vslsmglymg etetkvmgnd lgfpqqgqis lssgetdlkl leesianlnr stsvpenpks  
sastavsaaap tekefpkths dvsseqqhlk gqgtnggnv klyttdqstf dilqdefss gspgketnes  
pwrsdllide ncllspilage ddsfllegns nedckplilp dtkpkikdng dqfivtd

**Table 2: A list of mammalian expression vectors**

| <b>Plasmid vector</b>       | <b>Site of mutation</b> | <b>Type of mutation</b>   |
|-----------------------------|-------------------------|---------------------------|
| pECFP-GR500                 | none                    | Wild-type                 |
| pECFP-GR500-S203A           | 203                     | Ser-Ala                   |
| pECFP-GR500-S203E           | 203                     | Ser-Glu                   |
| pECFP-GR500-S211A           | 211                     | Ser-Ala                   |
| pECFP-GR500-S211E           | 211                     | Ser-Glu                   |
| pECFP-GR500-S226A           | 226                     | Ser-Ala                   |
| pECFP-GR500-S226E           | 226                     | Ser-Glu                   |
| pECFP-GR500-S(203-211)A     | 203, 211                | Ser-Ala, Ser-Ala          |
| pECFP-GR500-S(203-226)A     | 203, 226                | Ser-Ala, Ser-Ala          |
| pECFP-GR500-S(211-226)A     | 211, 226                | Ser-Ala, Ser-Ala          |
| pECFP-GR500-S(203-211-226)A | 203, 211, 226           | Ser-Ala, Ser-Ala, Ser-Ala |

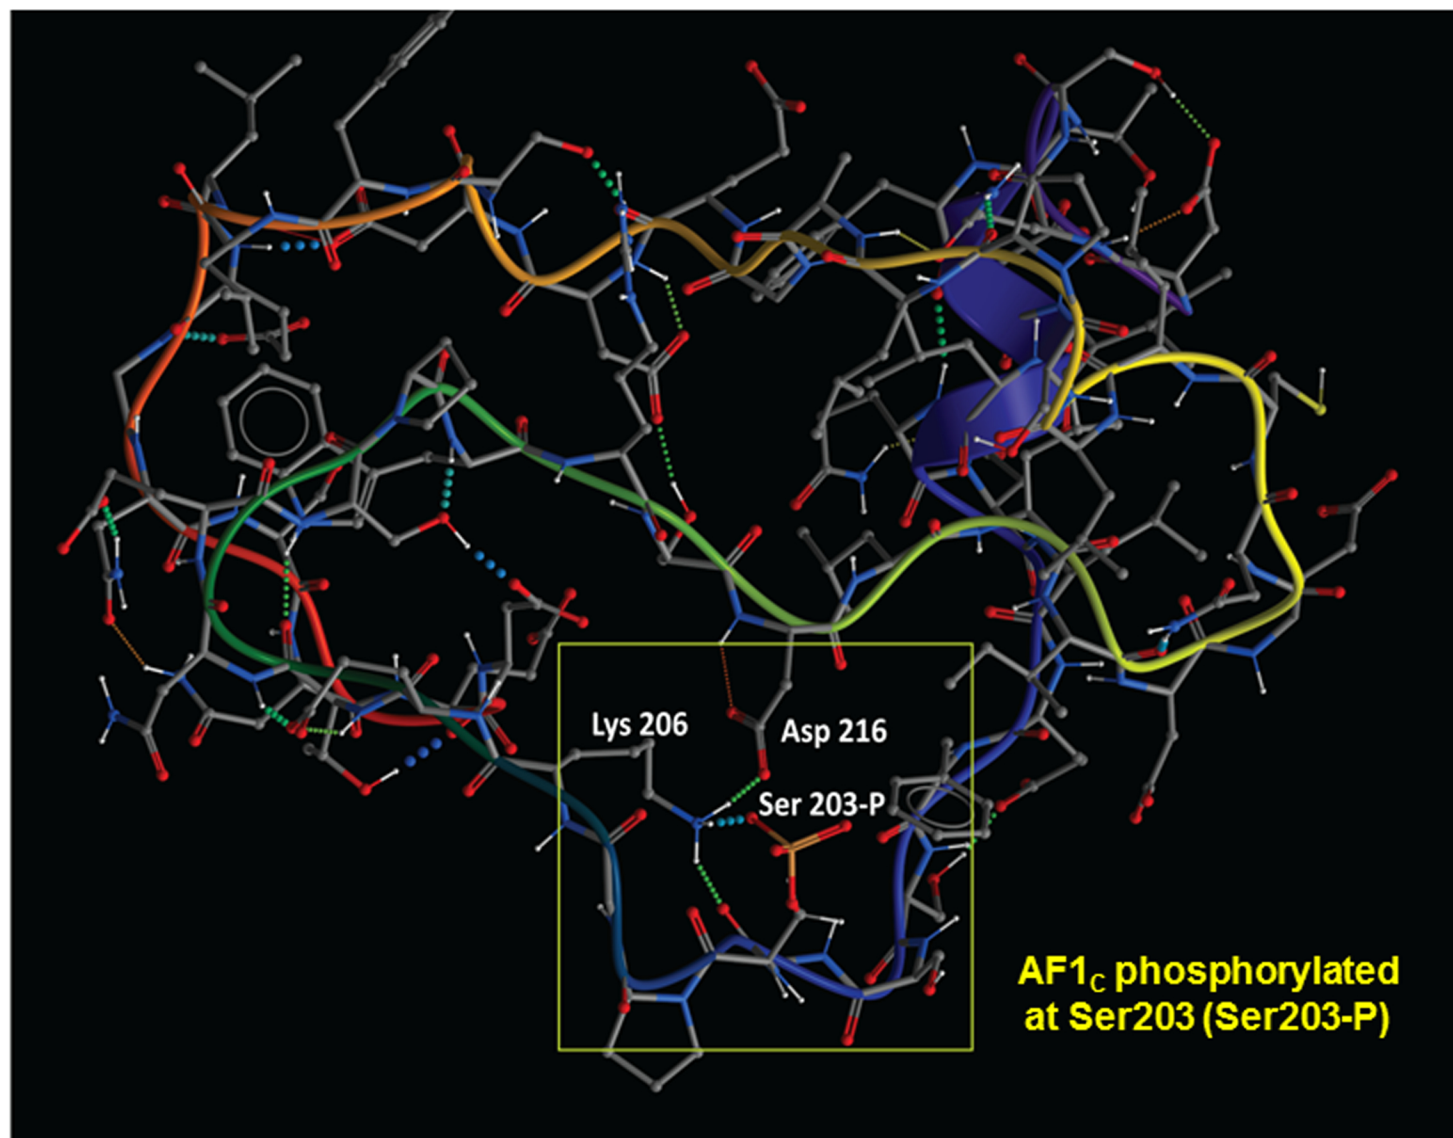

Supplemental Figure 1: A full view of AF1<sub>C</sub> (amino acids 187-242) of the human GR model with serine 203 phosphorylated. A model was initially built for the region in the unphosphorylated state using the I-TASSER software. Serine 203 was then phosphorylated using ICM-Pro. The resulting model was subjected to global optimization moves using biased probability Monte Carlo and local minimization calls as described in Materials and Methods. The resulting model shows an interaction between negatively charged phosphorylated Ser203 (Ser203-P) and Lys206 residue where a hydrogen bond is indicated with blue spheres (shown in the box).

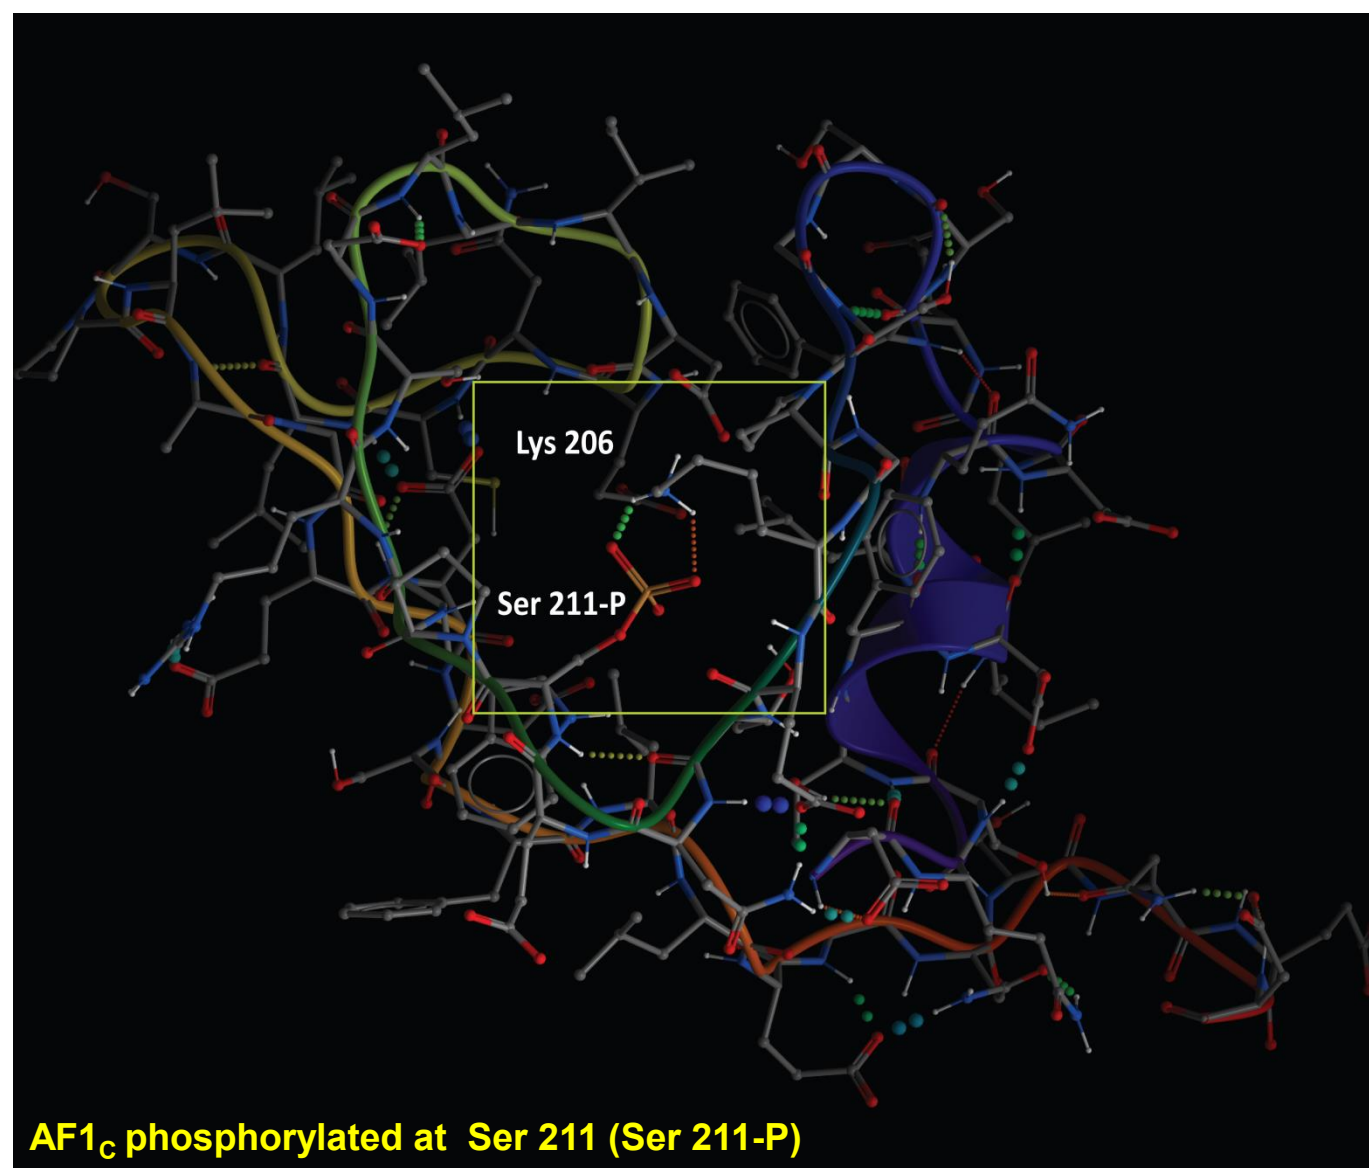

Supplemental Figure 2: A full view of AF1<sub>C</sub> (amino acids 187-242) of the human GR modeling the phosphorylation of serine 211. An interaction with two hydrogen bonds between negatively charged phosphorylated Ser211 (Ser211-P) and Lys206 residues is seen (shown in the box).

**AF1<sub>C</sub> phosphorylated at Ser 226 (Ser 226-P)**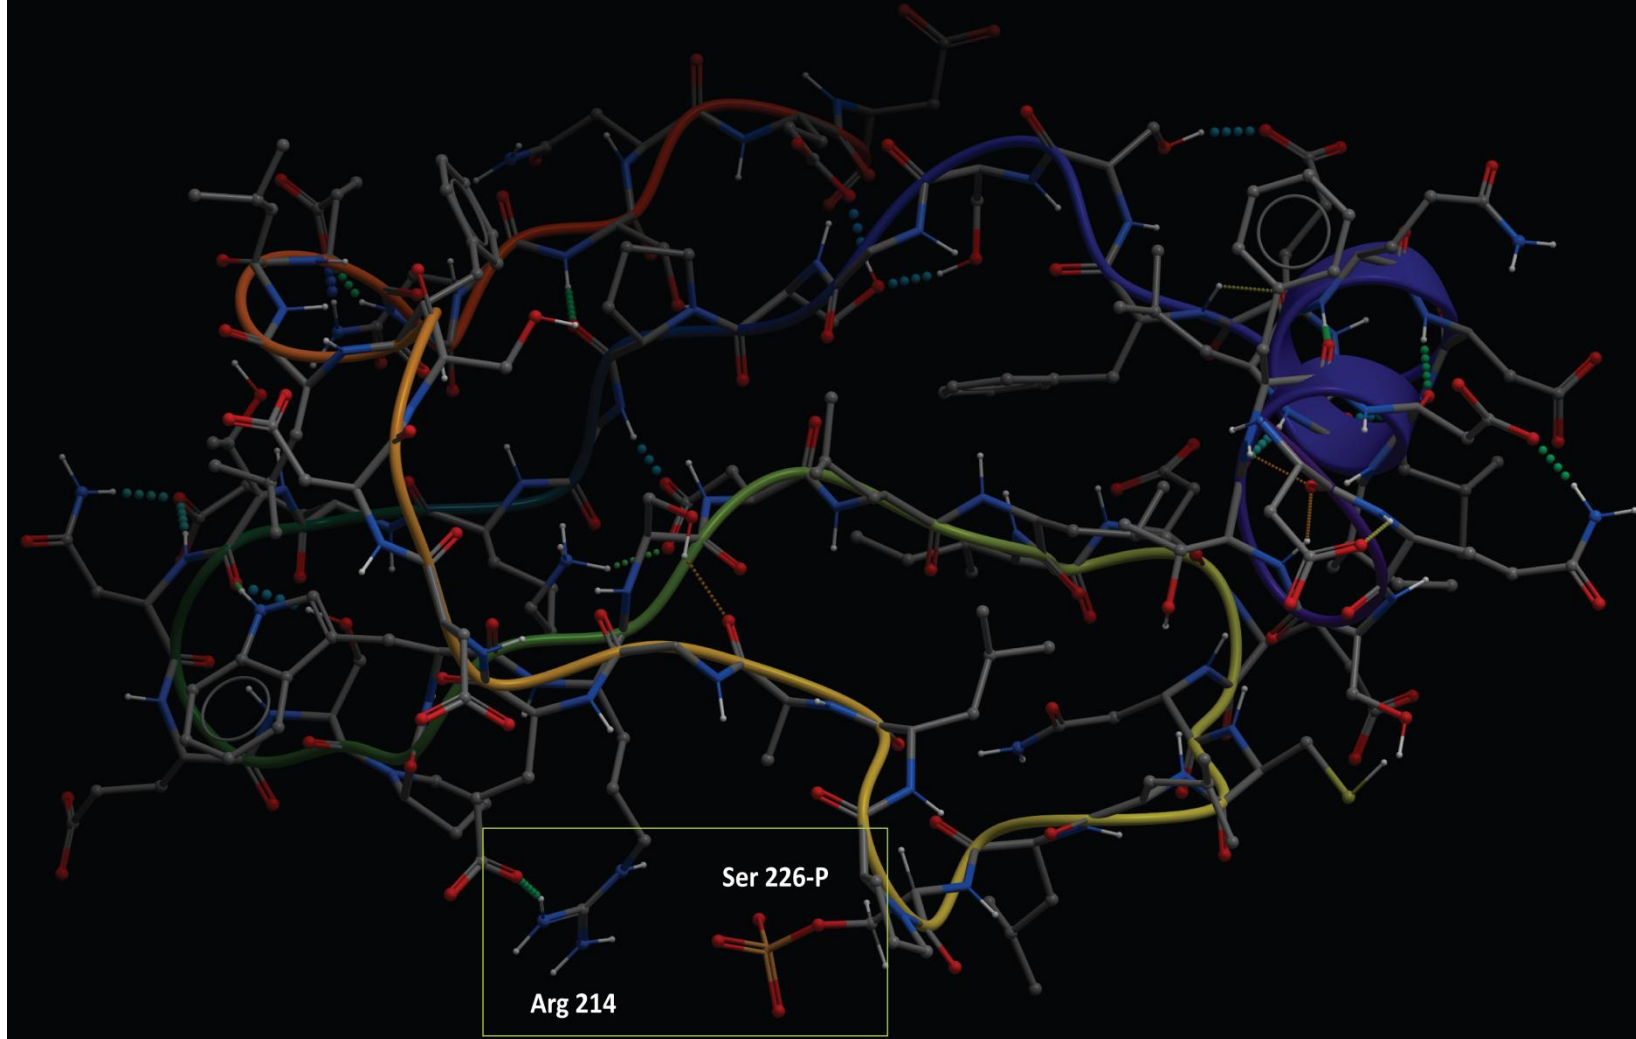

Supplemental Figure 3: A full view of AF1<sub>C</sub> (amino acids 187-242) of the human GR modeling the phosphorylation of Ser226. A close proximity, but no apparent hydrogen bonds, between the negatively charged phosphorylated Ser226 (Ser226-P) and Arg214 residues are seen (shown in the box).

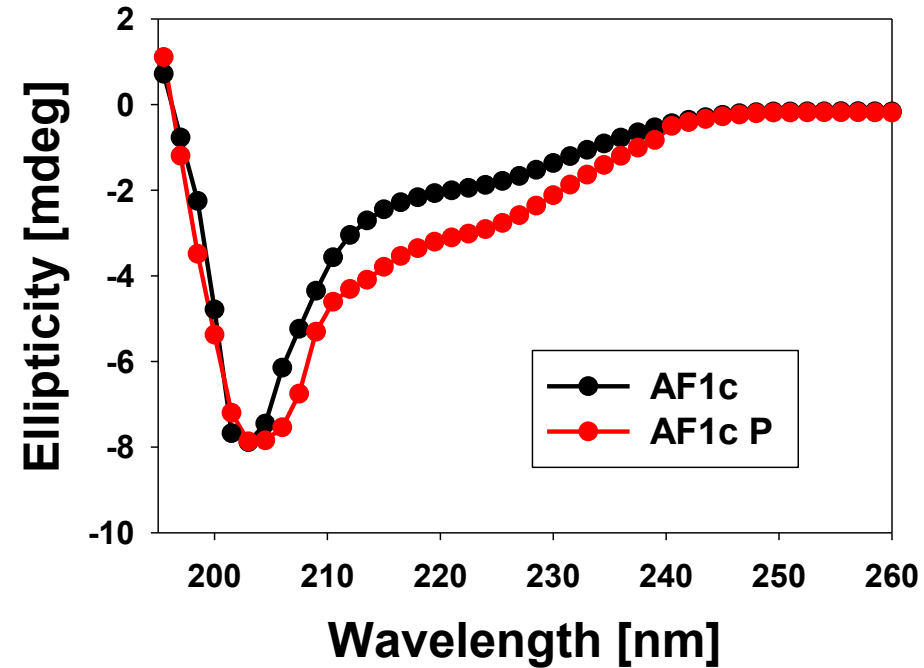

Supplemental Figure 4: Far-UV CD spectra of the recombinant GR AF1<sub>C</sub> with or without phosphorylated. AF1<sub>C</sub>, unphosphorylated AF1<sub>C</sub>; AF1<sub>C</sub>P, phosphorylated AF1. Each spectrum represents an average of five spectra recorded, corrected for the contribution of the buffer and smoothed.

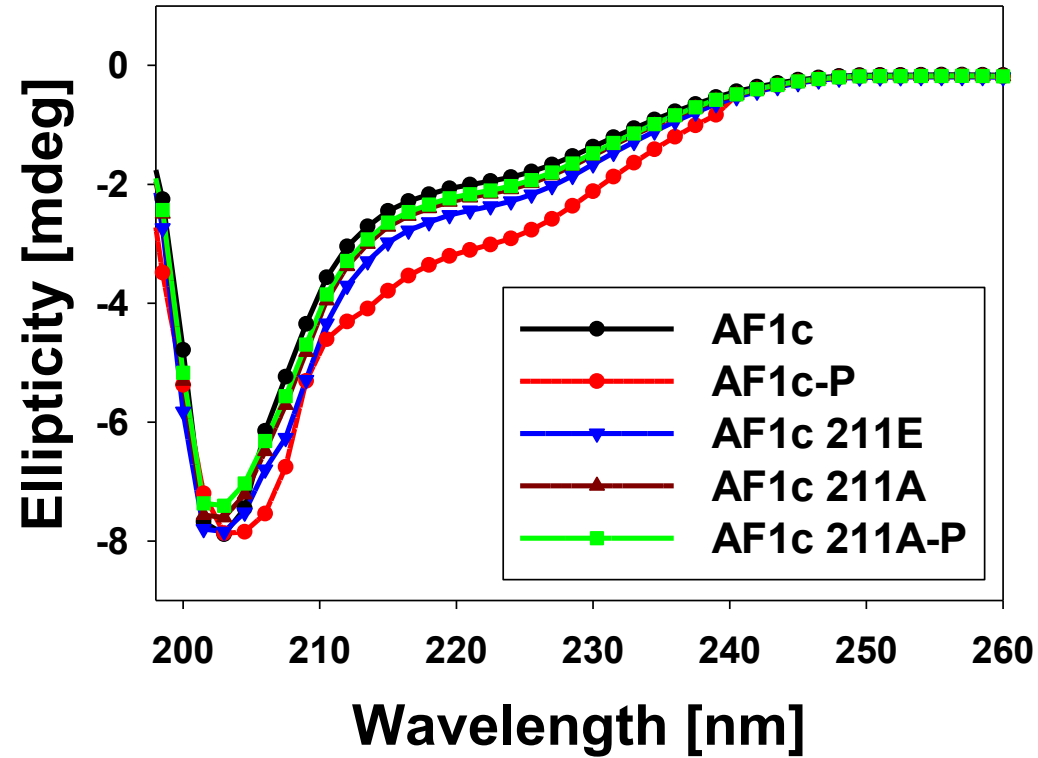

Supplemental Figure 5: Far-UV CD spectra of the GR AF1<sub>C</sub> (WT) and AF1<sub>C</sub>-S211A with or without p38 MAPK treated, and AF1<sub>C</sub>-S211E. AF1<sub>C</sub>, unphosphorylated AF1<sub>C</sub>; and AF1<sub>C</sub> P, phosphorylated AF1<sub>C</sub>. Each spectrum represents an average of five spectra recorded, corrected for the contribution of the buffer and smoothed.



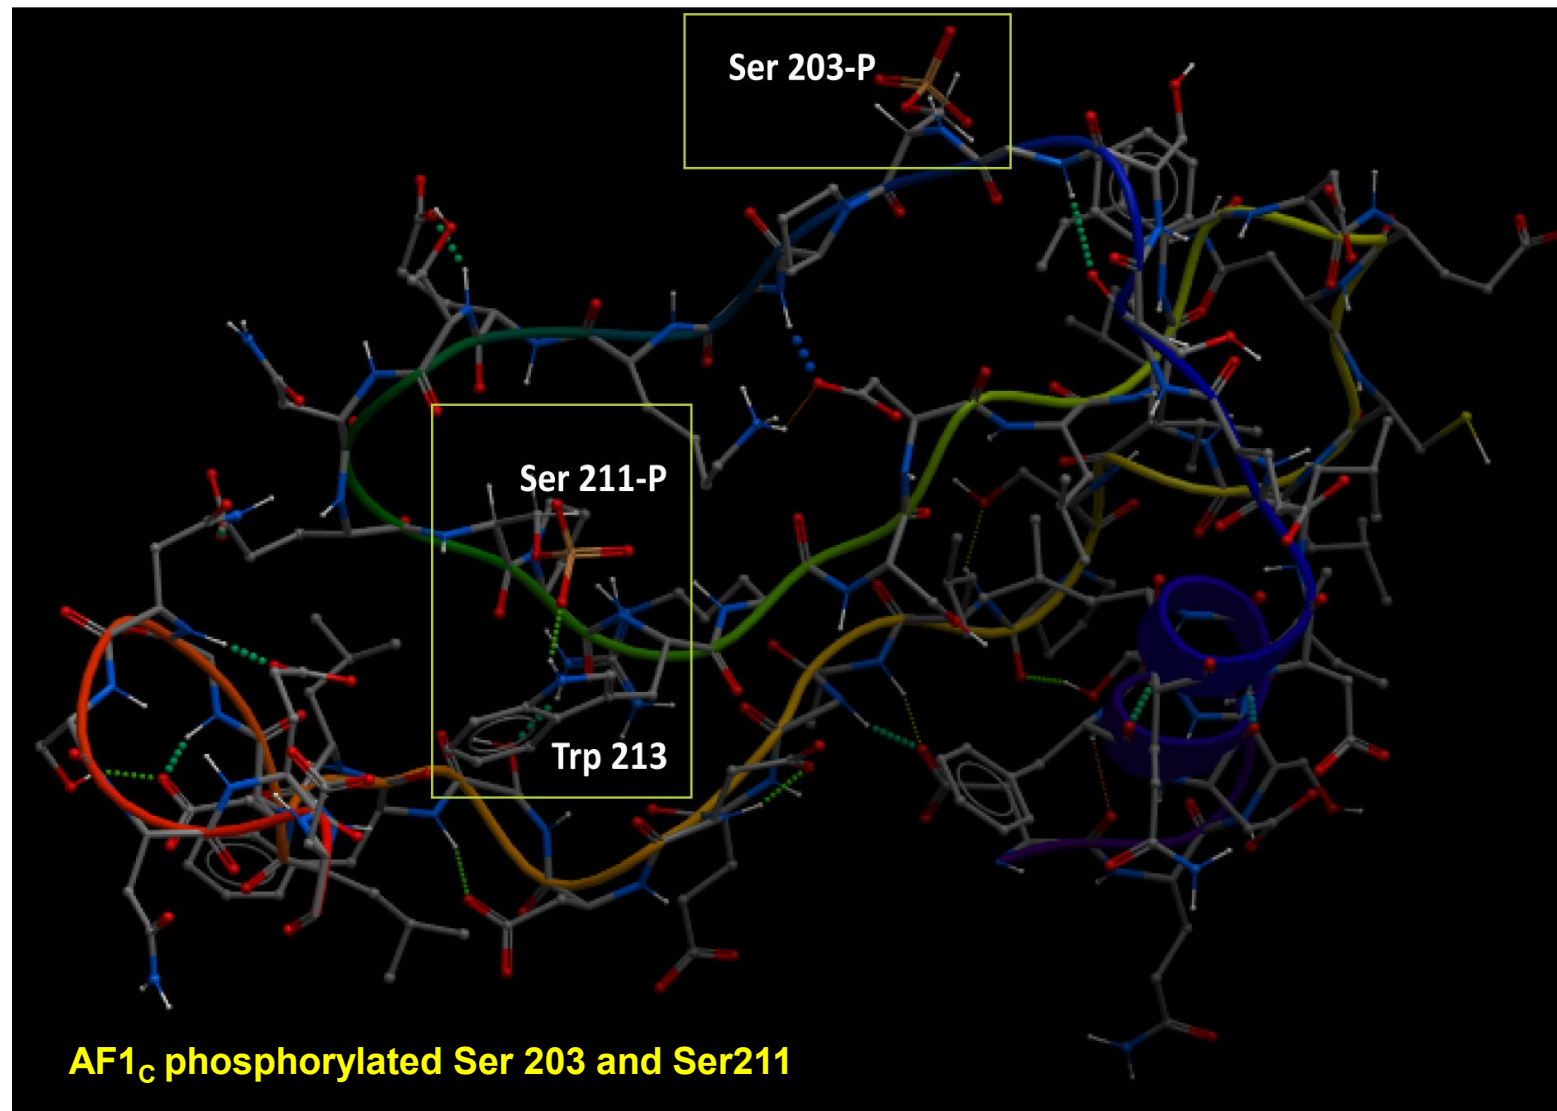

Supplemental Figure 6: A full view of AF1<sub>C</sub> (amino acids 187-242) of the human GR model with Ser203 and Ser211 residues simultaneously phosphorylated. In this case, phosphorylated Ser203 is seen to interact with solvent whereas Ser211 interacts with Trp213 (shown in the boxes).

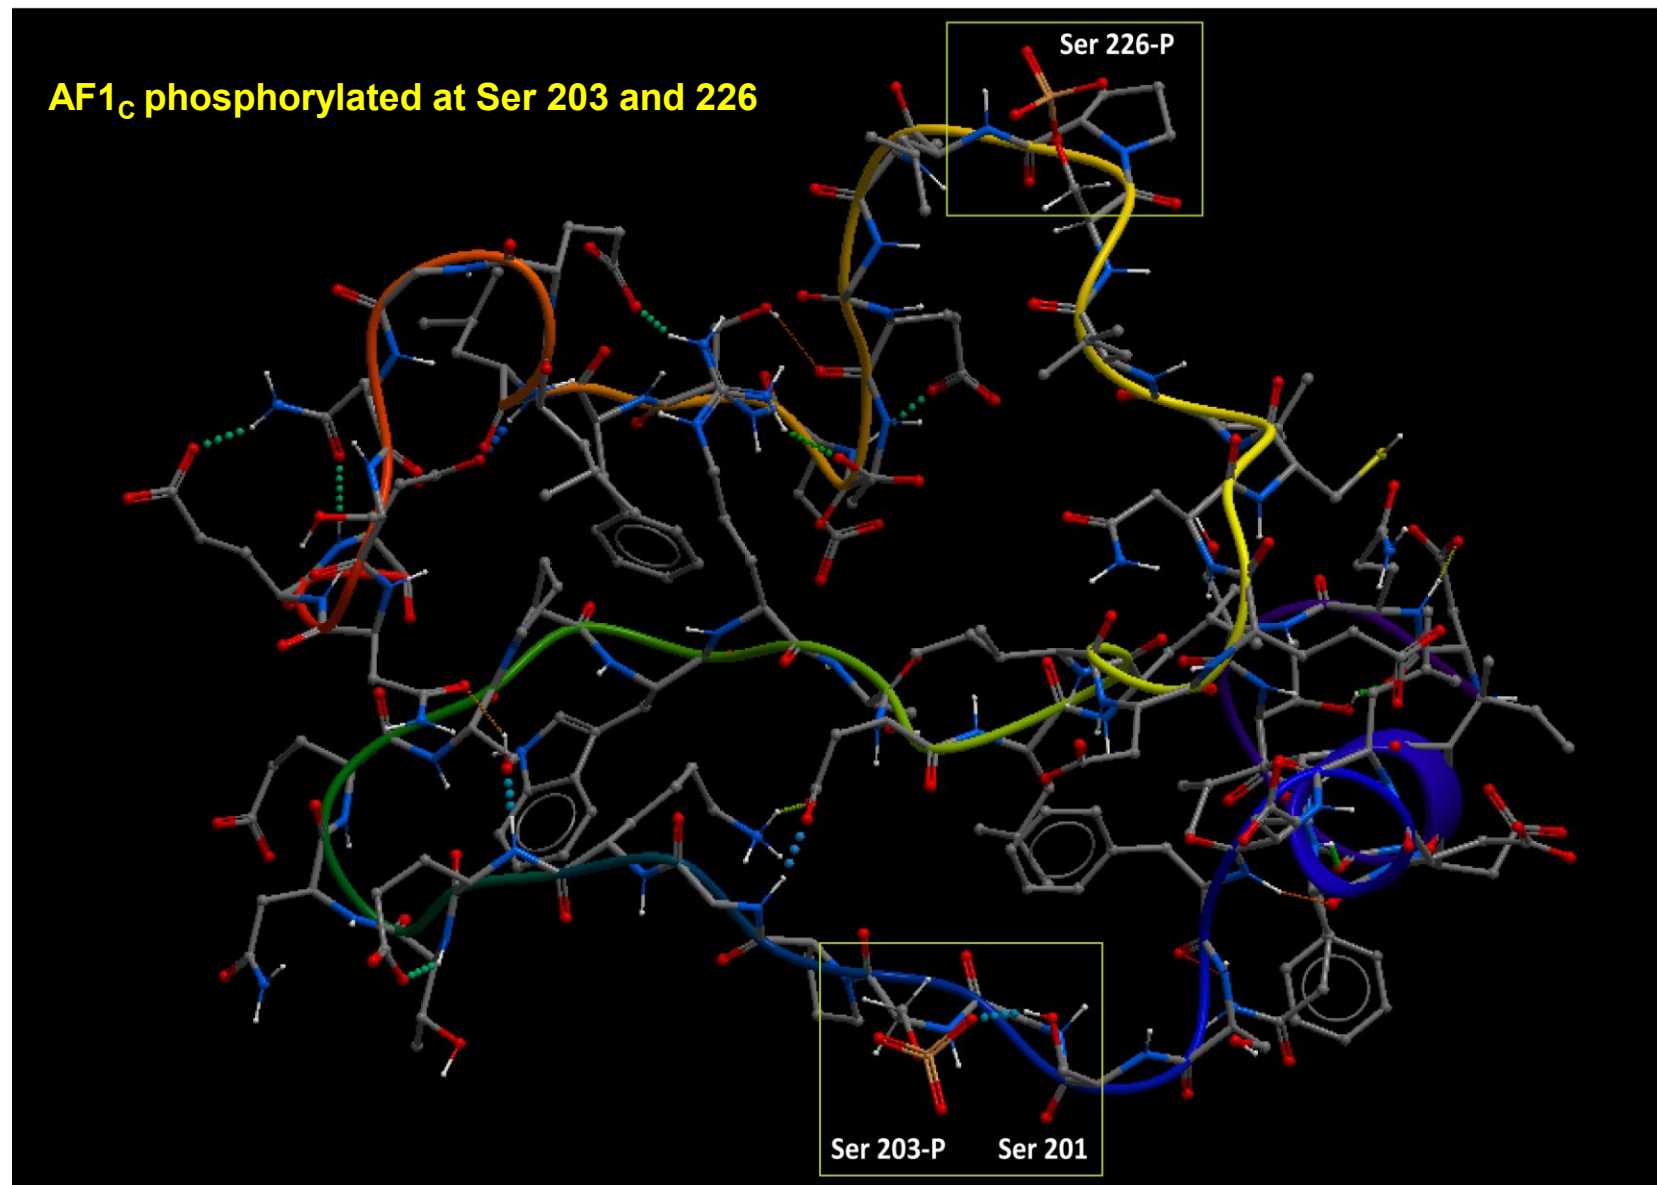

Supplemental Figure 7: A full view of AF1<sub>C</sub> (amino acids 187-242) of the human GR model with Ser203 and Ser226 residues simultaneously phosphorylated. In this case, phosphorylated Ser203 is seen to interact with Ser201 whereas Ser226 interacts with solvent (shown in the boxes).

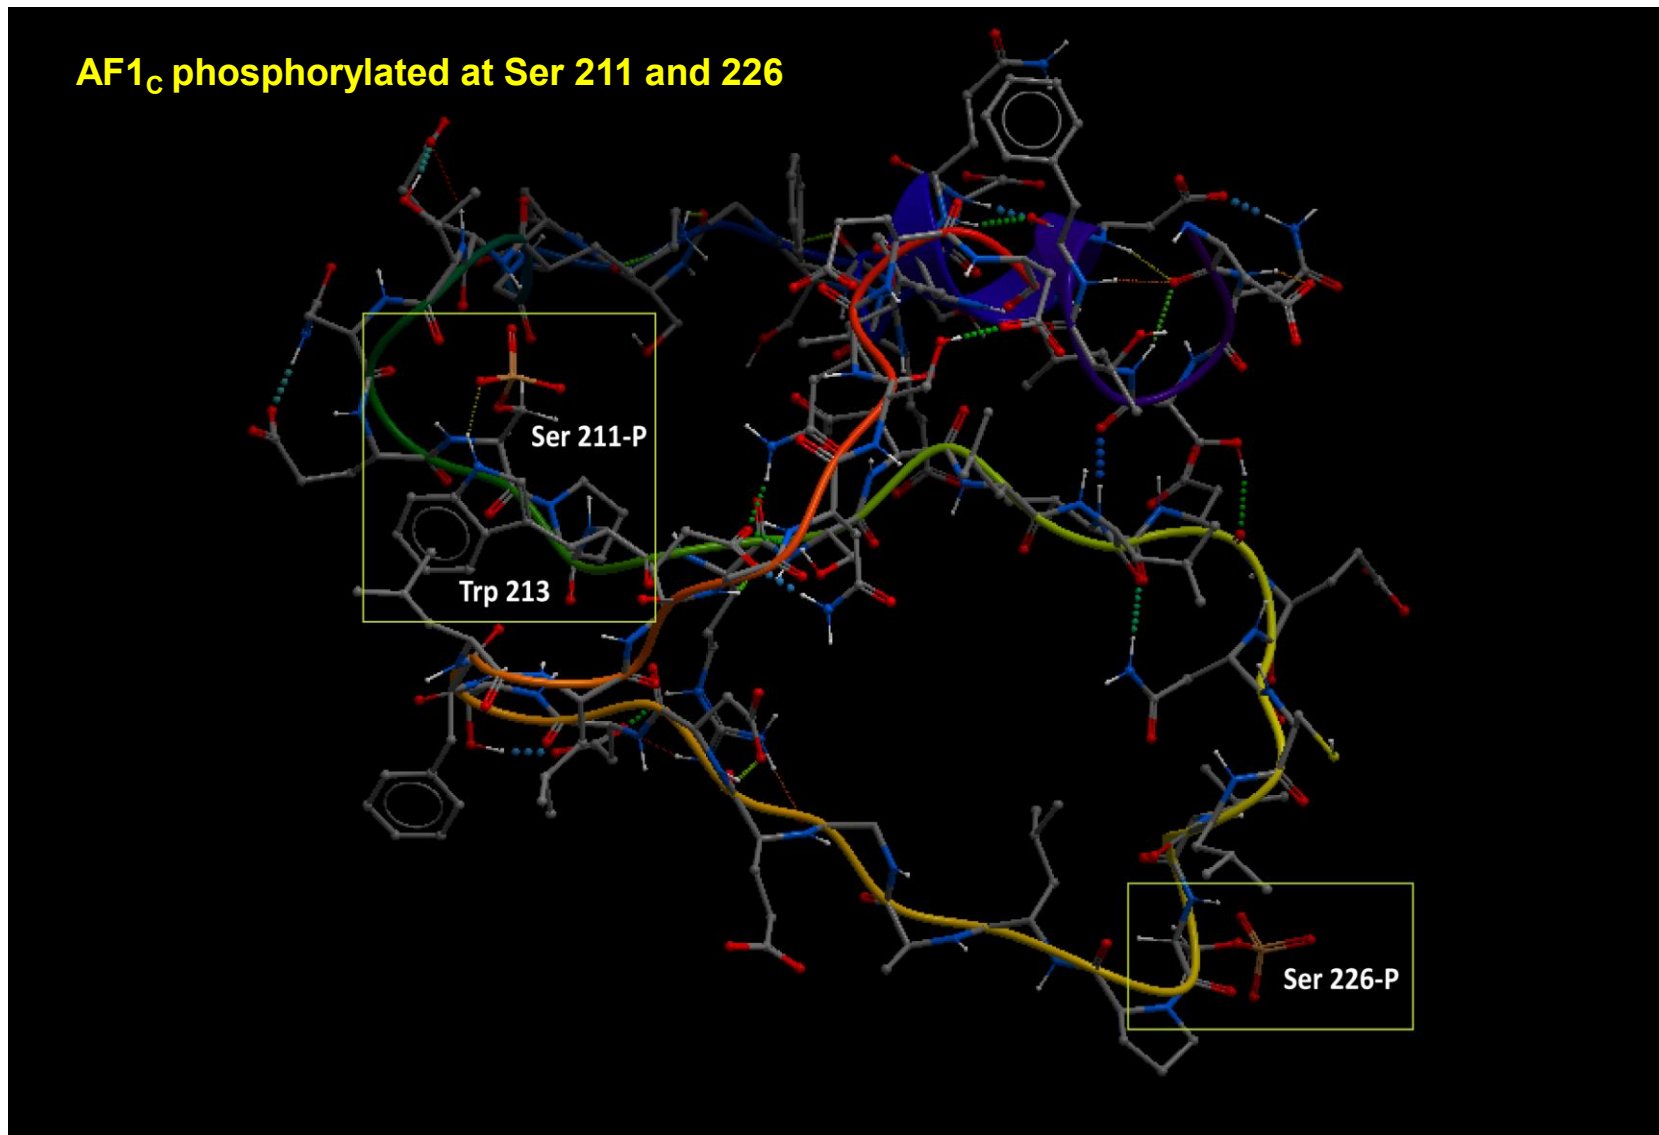

Supplemental Figure 8: A full view of AF1<sub>C</sub> (amino acids 187-242) of the human GR model with Ser211 and Ser226 residues simultaneously phosphorylated. In this case, phosphorylated Ser226 is seen to interact with solvent whereas Ser211 interacts with Trp213 (shown in the boxes).

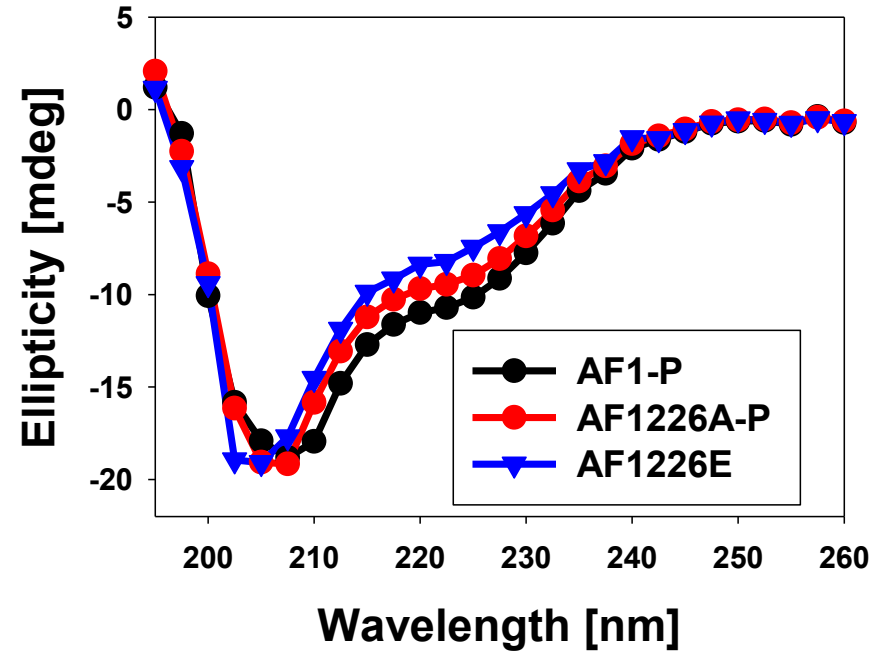

Supplemental Figure 9: Far-UV CD spectra of the GR AF1 (WT) and AF1-S226A treated with p38 MAPK, and AF1-S226E. AF1-P, phosphorylated AF1; AF1226A-P, AF1-S226A treated with p38 MAPK. Each spectrum represents an average of five spectra recorded, corrected for the contribution of the buffer and smoothed.

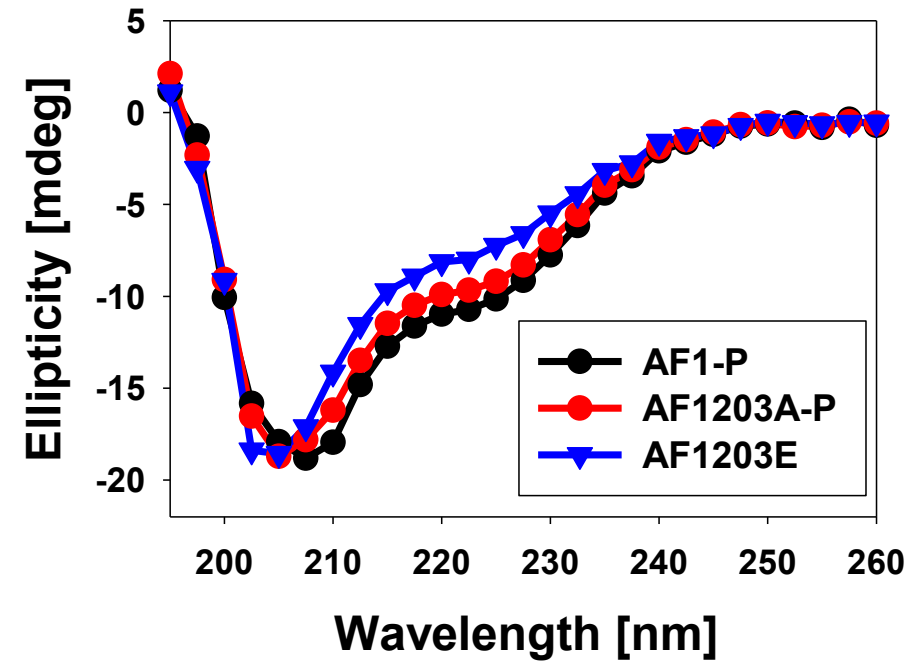

Supplemental Figure 10: Far-UV CD spectra of the GR AF1 (WT) and AF1-S203A treated with p38 MAPK, and AF1-S203E. AF1-P, phosphorylated AF1; AF1226A-P, AF1-S226A treated with p38 MAPK. Each spectrum represents an average of five spectra recorded, corrected for the contribution of the buffer and smoothed.
